# Supplementary material for: Novel MscL agonists that allow multiple antibiotics cytoplasmic access activate the channel through a common binding site
Source: PubMed Central journal article supplement (PMC6980572; doi:10.1371/journal.pone.0228153), 2020-01-24
Supplement: pone.0228153.s002.pdf [file pone.0228153.s002.pdf]

**Supplemental; Small compounds modulate and bind MscL similarly**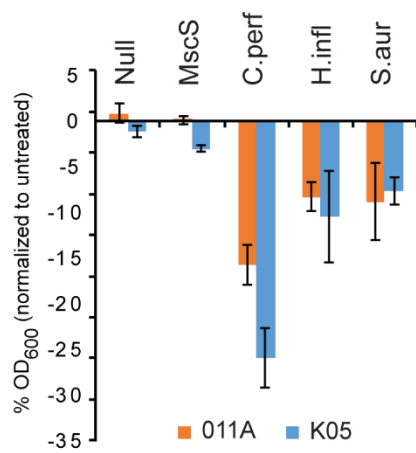

**S2 Fig. MscL orthologues show a similar growth restriction profile for 011A and K05.** Reduction in bacterial growth (OD<sub>600</sub>) for cultures of the *E. coli* MJF455 strain carrying empty plasmid (null), or expressing Eco-MscS (MscS), *C. perfringens* (C. perf), *S. aureus* (S. aur), or *H. influenza* (H. infl) constructs treated with compounds 011A (orange) and K05 (blue) at 60uM relative to non-treated are shown. Values represent the mean of four experiments and error bars are the SEM.
