# Supplementary material for: Novel MscL agonists that allow multiple antibiotics cytoplasmic access activate the channel through a common binding site
Source: PubMed Central journal article supplement (PMC6980572; doi:10.1371/journal.pone.0228153), 2020-01-24
Supplement: pone.0228153.s003.pdf [file pone.0228153.s003.pdf]

**Supplemental; Small compounds modulate and bind MscL similarly**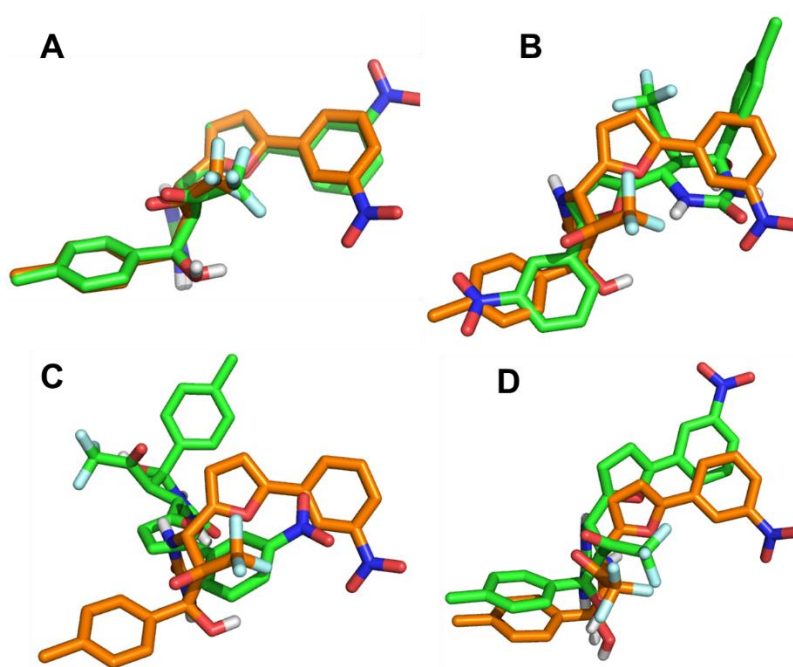

**S3 Fig. Comparison between top docking poses and the representative conformations of the two clusters sampled by MD simulations.** The Top 1 pose (docking score = -7.22 kcal/mol) is always shown as brownish sticks and three other poses are shown in greenish sticks: Docking Pose 2 (docking score = -6.66 kcal/mol) in Panel A, Docking Pose 3 (docking score = -6.55 kcal/mol) in Panel B and Docking Pose 4 (docking score = -6.48 kcal/mol) in Panel C. The representative conformations of Clusters 1 and 2 are shown as greenish and brownish sticks (Panel D).
