# Supplementary material for: Novel MscL agonists that allow multiple antibiotics cytoplasmic access activate the channel through a common binding site
Source: PubMed Central journal article supplement (PMC6980572; doi:10.1371/journal.pone.0228153), 2020-01-24
Supplement: pone.0228153.s004.pdf [file pone.0228153.s004.pdf]

**Supplemental; Small compounds modulate and bind MscL similarly**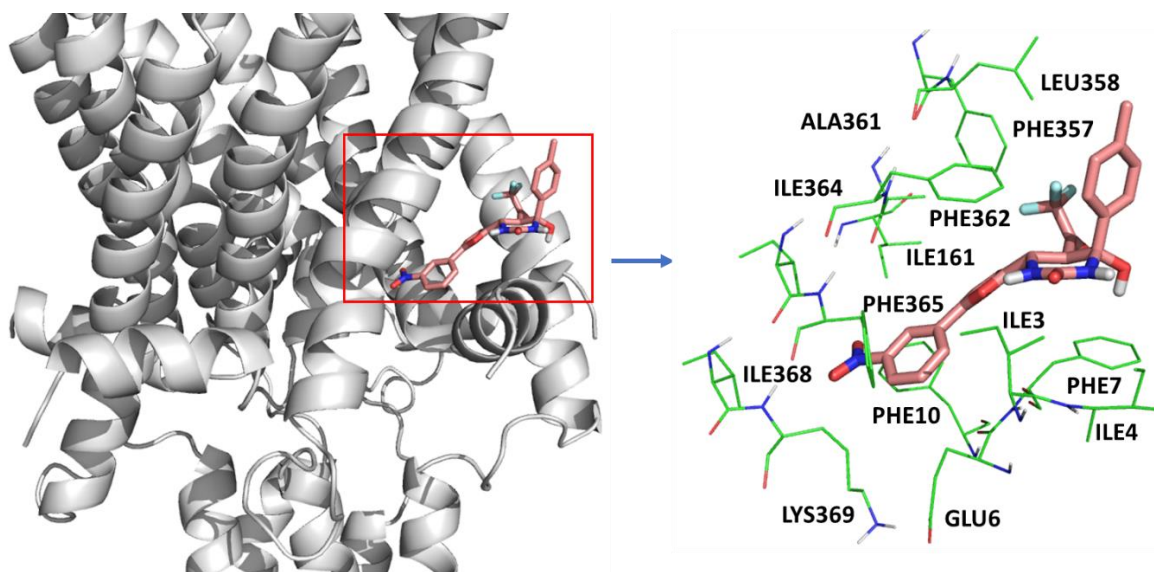

**S4 Fig. Binding pocket (left) and the key residues interacting with K05 (right) for Docking Pose 3.**
