# Supplementary material for: Novel MscL agonists that allow multiple antibiotics cytoplasmic access activate the channel through a common binding site
Source: PubMed Central journal article supplement (PMC6980572; doi:10.1371/journal.pone.0228153), 2020-01-24
Supplement: pone.0228153.s007.pdf [file pone.0228153.s007.pdf]

## Supplemental; Small compounds modulate and bind MscL similarly

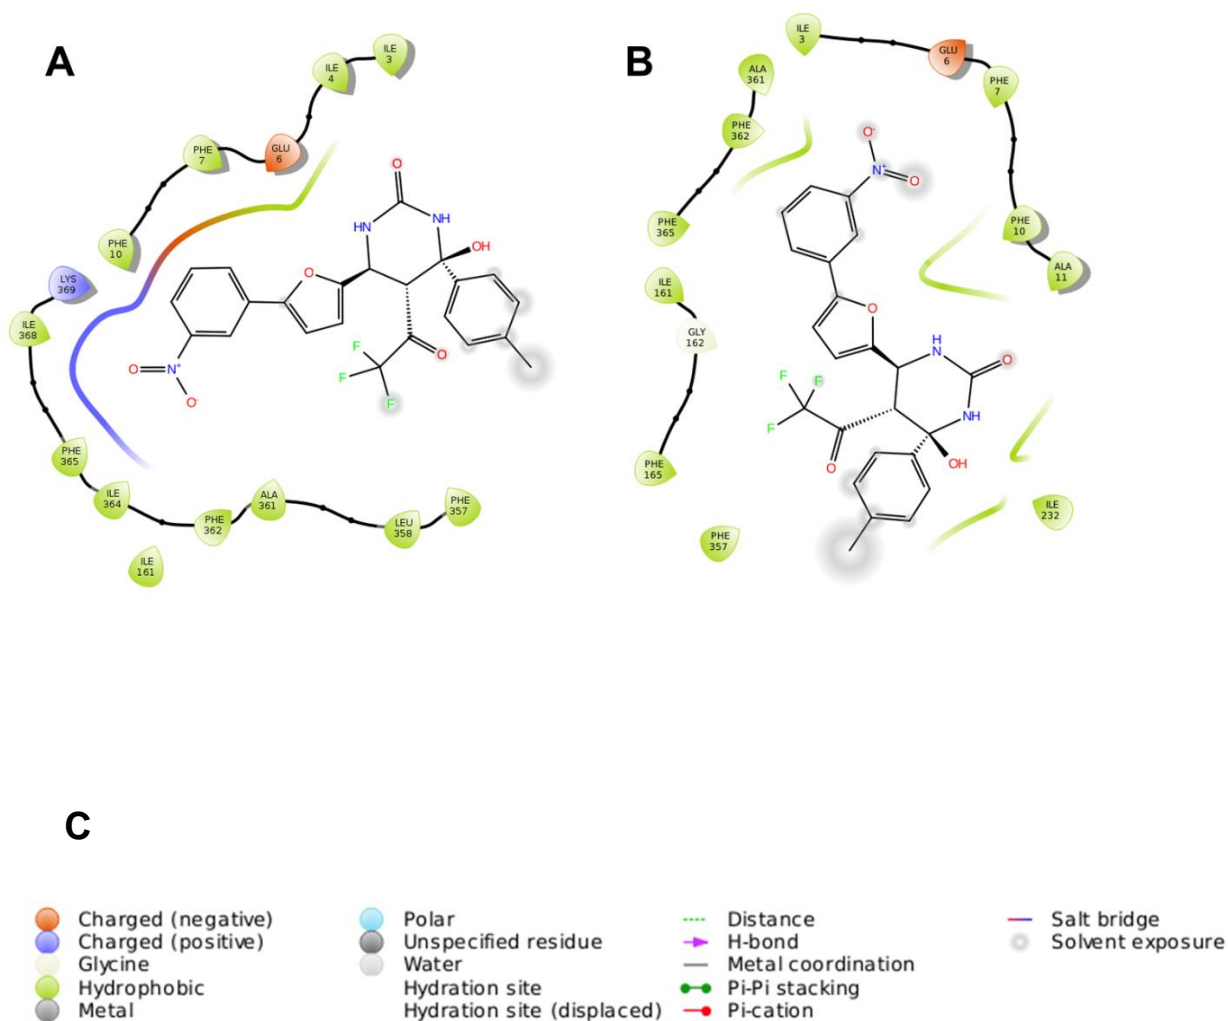

**S7 Fig. 2D-Diagram of detailed interactions between K05 and Eco-MscL revealed by Docking Pose 3 (Panel A), and Docking Pose 4 (Panel B). The key of interaction types and sites in shown in the Panel C.**
