# Supplementary material for: Novel MscL agonists that allow multiple antibiotics cytoplasmic access activate the channel through a common binding site
Source: PubMed Central journal article supplement (PMC6980572; doi:10.1371/journal.pone.0228153), 2020-01-24
Supplement: pone.0228153.s009.pdf [file pone.0228153.s009.pdf]

## Supplemental; Small compounds modulate and bind MscL similarly

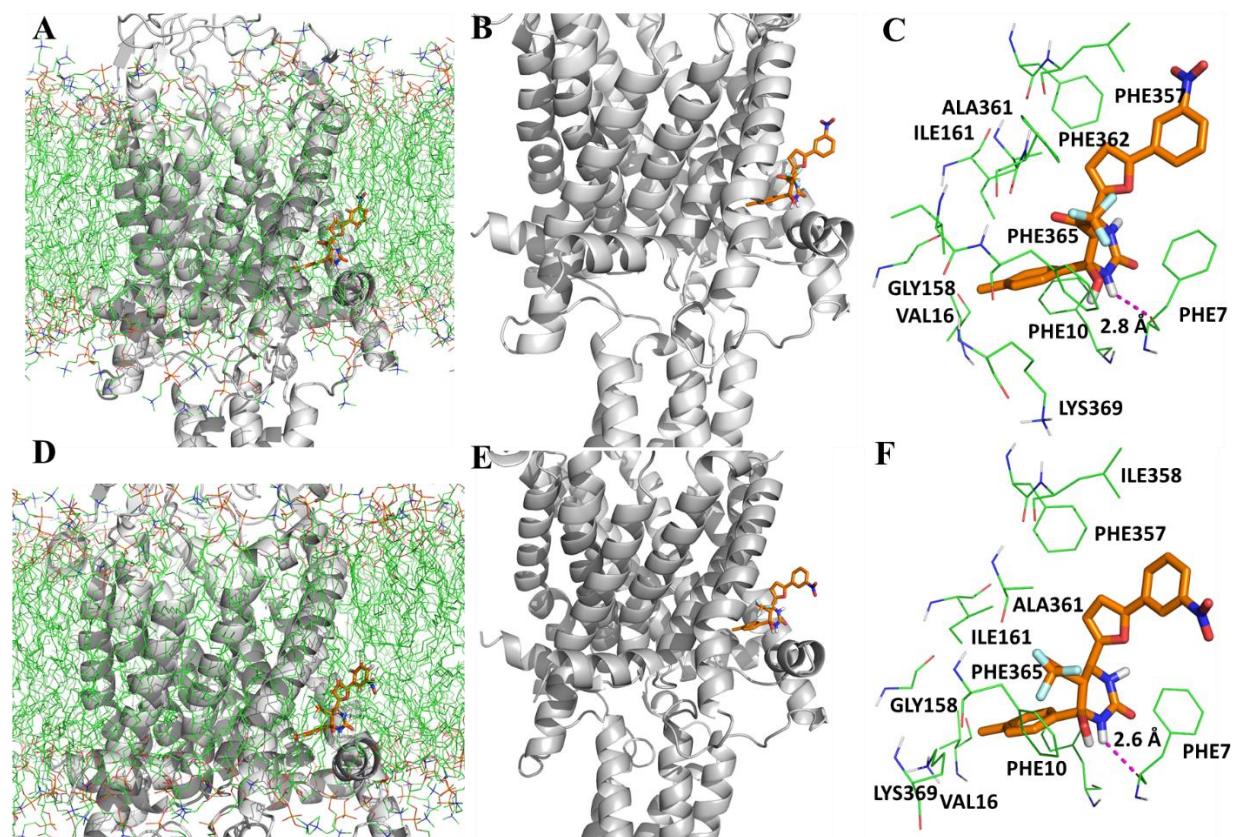

**S9 Fig.** A representative conformation of the first (Panels A-C) and second (Panels D-F) conformational clusters. (A) and (D): MscL/K05 in 240 POPC lipid; (B) and (E): MscL/K05 complex; (C) and (F): detailed interaction of the binding mode.
