# Supplementary material for: Novel MscL agonists that allow multiple antibiotics cytoplasmic access activate the channel through a common binding site
Source: PubMed Central journal article supplement (PMC6980572; doi:10.1371/journal.pone.0228153), 2020-01-24
Supplement: pone.0228153.s012.pdf [file pone.0228153.s012.pdf]

**Supplemental; Small compounds modulate and bind MscL similarly**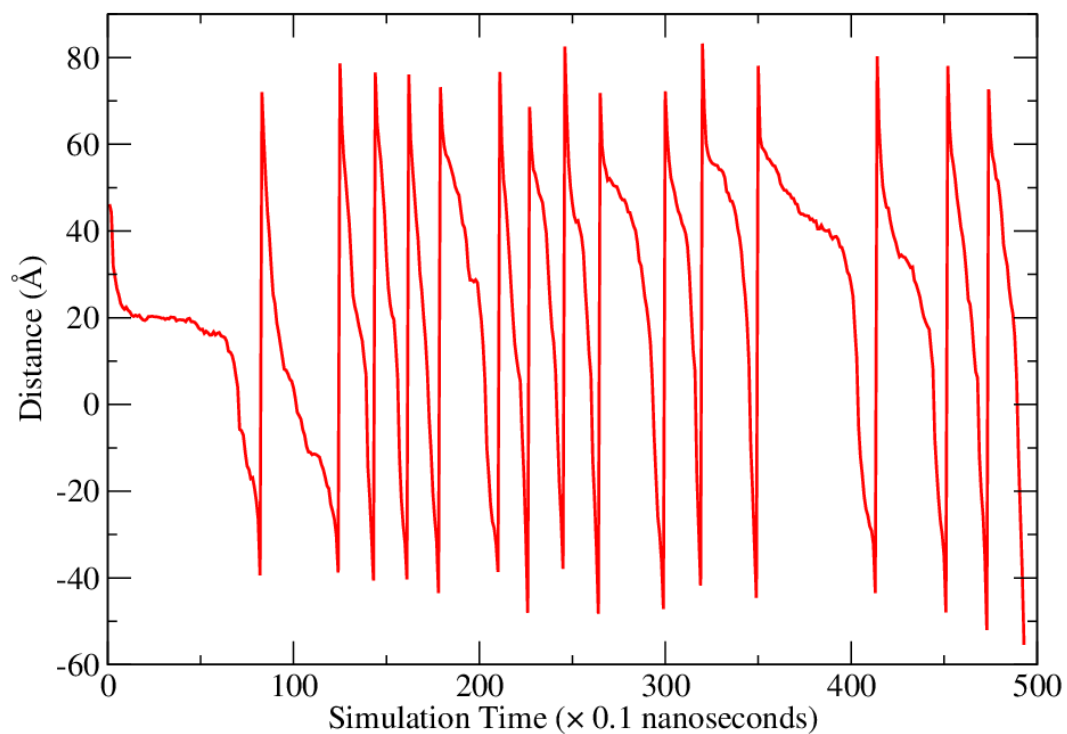

**S12 Fig. Passing-through experiment induced by an external electric field of 0.2 Volt/Å applied to DHS.** DHS passed through the MscL channel 15 times within 50 nanoseconds. The distance is between the center of the DHS and the center of five LYS106 residues.
