# Supplementary material for: Novel MscL agonists that allow multiple antibiotics cytoplasmic access activate the channel through a common binding site
Source: PubMed Central journal article supplement (PMC6980572; doi:10.1371/journal.pone.0228153), 2020-01-24
Supplement: pone.0228153.s014.pdf [file pone.0228153.s014.pdf]

## Supplemental; Small compounds modulate and bind MscL similarly

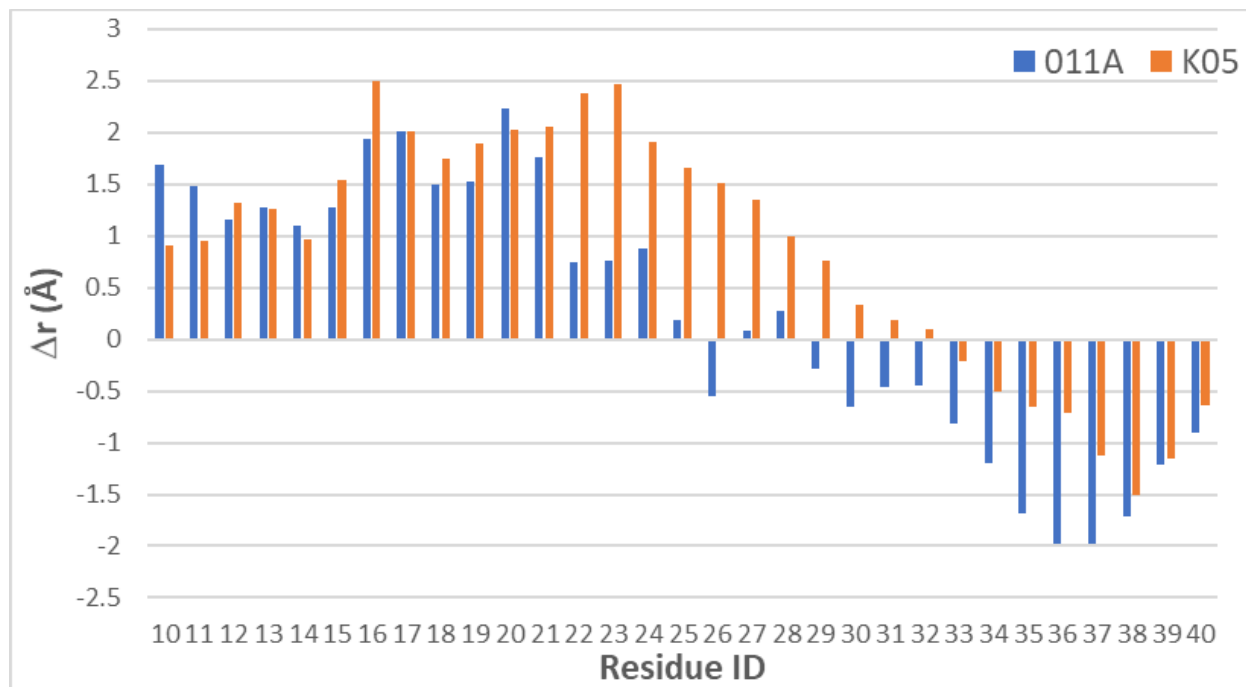

**S14 Fig. The changes of channel radii upon ligand binding.**  $\Delta r = r_{MscL/Lig} - r_{MscL}$ , where  $r_{MscL/Lig}$  is the channel radii for the MscL/011A or MscL/K05 complex and  $r_{MscL}$  is that for MscL protein only. The radii parameters were calculated for a set of channel-open conformations obtained from passing-through experiment.
