# Supplementary material for: Novel MscL agonists that allow multiple antibiotics cytoplasmic access activate the channel through a common binding site
Source: PubMed Central journal article supplement (PMC6980572; doi:10.1371/journal.pone.0228153), 2020-01-24
Supplement: pone.0228153.s018.pdf [file pone.0228153.s018.pdf]

## Supplemental; Small compounds modulate and bind MscL similarly

**S1Table. List of MM-PBSA free energy components (in kcal/mol) for three top docking poses.  $\epsilon_{lip}$  is the dielectric constant of the lipids.**

| System         | vdW                    | EEL                      | $\Delta G_{pol}^{PB}$   |                         |                         | $\Delta G_{nonpolar}^{SAS}$ | T $\Delta$ s          | MM-PBSA                  |                          |                          |
|----------------|------------------------|--------------------------|-------------------------|-------------------------|-------------------------|-----------------------------|-----------------------|--------------------------|--------------------------|--------------------------|
|                |                        |                          | $\epsilon_{lip}=1$      | $\epsilon_{lip}=2$      | $\epsilon_{lip}=4$      |                             |                       | $\epsilon_{lip}=1$       | $\epsilon_{lip}=2$       | $\epsilon_{lip}=4$       |
| Docking Pose 1 | -5128.70<br>$\pm$ 1.97 | -46350.91<br>$\pm$ 5.20  | -5467.61<br>$\pm$ 2.70  | -5028.58<br>$\pm$ 1.10  | -4786.99<br>$\pm$ 3.34  | 204.30 $\pm$<br>0.06        | 7750.53<br>$\pm$ 0.57 | -64493.46<br>$\pm$ 7.08  | -64054.43<br>$\pm$ 5.23  | -63812.83<br>$\pm$ 6.16  |
| Docking Pose 3 | -5108.47<br>$\pm$ 4.26 | -46619.83<br>$\pm$ 21.81 | -5114.58<br>$\pm$ 29.76 | -4675.69<br>$\pm$ 28.24 | -4426.39<br>$\pm$ 27.68 | 206.34 $\pm$<br>0.10        | 7761.97<br>$\pm$ 0.46 | -64398.50<br>$\pm$ 20.81 | -63959.62<br>$\pm$ 22.02 | -63710.32<br>$\pm$ 22.77 |
| Docking Pose 4 | -5112.89<br>$\pm$ 6.02 | -46744.48<br>$\pm$ 29.90 | -4955.35<br>$\pm$ 7.02  | -4536.67<br>$\pm$ 8.16  | -4303.64<br>$\pm$ 9.45  | 204.70 $\pm$<br>0.03        | 7756.02<br>$\pm$ 0.73 | -64364.04<br>$\pm$ 23.37 | -63945.35<br>$\pm$ 22.06 | -63712.32<br>$\pm$ 22.90 |
