# Supplementary material for: Novel MscL agonists that allow multiple antibiotics cytoplasmic access activate the channel through a common binding site
Source: PubMed Central journal article supplement (PMC6980572; doi:10.1371/journal.pone.0228153), 2020-01-24
Supplement: pone.0228153.s019.pdf [file pone.0228153.s019.pdf]

## Supplemental; Small compounds modulate and bind MscL similarly

**S2 Table. List of free energy components (in kcal/mol) for MM-PBSA binding free energy calculation.  $\epsilon_{lip}$  is the dielectric constant of the lipids.**

| System              | vdW                  | EEL                  | $\Delta G_{pol}^{PB}$ |                     |                     | $\Delta G_{nonpolar}^{SAS}$ | T $\Delta$ s         | Binding              |                      |                      |
|---------------------|----------------------|----------------------|-----------------------|---------------------|---------------------|-----------------------------|----------------------|----------------------|----------------------|----------------------|
|                     |                      |                      | $\epsilon_{lip}=1$    | $\epsilon_{lip}=2$  | $\epsilon_{lip}=4$  |                             |                      | $\epsilon_{lip}=1$   | $\epsilon_{lip}=2$   | $\epsilon_{lip}=4$   |
| Pose 1<br>Cluster 1 | -35.36<br>$\pm 0.74$ | -3.73<br>$\pm 0.34$  | 16.31<br>$\pm 0.30$   | 15.37<br>$\pm 0.28$ | 15.06<br>$\pm 0.23$ | -3.67 $\pm$<br>0.03         | -19.61<br>$\pm 0.13$ | -6.86 $\pm$<br>0.76  | -7.79 $\pm$<br>0.75  | -8.10 $\pm$<br>0.70  |
| Pose 1<br>Cluster 2 | -33.91<br>$\pm 0.71$ | -7.03<br>$\pm 0.46$  | 19.53<br>$\pm 0.39$   | 17.34<br>$\pm 0.23$ | 16.39<br>$\pm 0.29$ | -3.59 $\pm$<br>0.03         | -19.14<br>$\pm 0.28$ | -5.76 $\pm$<br>0.58  | -8.06 $\pm$<br>0.55  | -9.01 $\pm$<br>0.60  |
| Pose 1<br>Combined  | -34.94<br>$\pm 0.73$ | -4.69<br>$\pm 0.13$  | 17.25<br>$\pm 0.16$   | 15.93<br>$\pm 0.14$ | 15.44<br>$\pm 0.12$ | -3.65 $\pm$<br>0.03         | -19.47<br>$\pm 0.17$ | -6.55 $\pm$<br>0.66  | -7.90 $\pm$<br>0.62  | -8.37 $\pm$<br>0.57  |
| Pose 3              | -45.64<br>$\pm 0.17$ | -10.86<br>$\pm 0.36$ | 18.11<br>$\pm 0.13$   | 16.96<br>$\pm 0.02$ | 16.69<br>$\pm 0.03$ | -3.61 $\pm$<br>0.02         | -21.37<br>$\pm 0.07$ | -20.62 $\pm$<br>0.24 | -21.78<br>$\pm 0.23$ | -22.05 $\pm$<br>0.26 |
| Pose 4              | -33.55<br>$\pm 0.09$ | -8.18<br>$\pm 0.19$  | 21.10<br>$\pm 0.13$   | 17.64<br>$\pm 0.21$ | 16.37<br>$\pm 0.26$ | -3.49 $\pm$<br>0.01         | -19.39<br>$\pm 0.04$ | -4.73 $\pm$<br>0.20  | -8.20 $\pm$<br>0.17  | -9.47 $\pm$<br>0.20  |
