# Supplementary material for: Novel MscL agonists that allow multiple antibiotics cytoplasmic access activate the channel through a common binding site
Source: PubMed Central journal article supplement (PMC6980572; doi:10.1371/journal.pone.0228153), 2020-01-24
Supplement: pone.0228153.s020.pdf [file pone.0228153.s020.pdf]

## Supplemental; Small compounds modulate and bind MscL similarly

**S3 Table. Hotspot residue identification using MM-GBSA binding free energy decomposition analysis for Eco-MscL/K05.** A hotspot residue is recognized when its interaction energy with the ligand is better than -1.0 kcal/mol. Those cells without numbers have neglectable interaction energies.

| Hotspot Residue | Scenario 3<br>Channel-Close | Scenario 7<br>Channel-Open |
|-----------------|-----------------------------|----------------------------|
| PHE7            | -6.58                       |                            |
| PHE10           | -5.12                       | -0.11                      |
| ALA11           | -0.27                       | -1.25                      |
| ARG13           |                             | -3.93                      |
| <b>GLY14</b>    |                             | <b>-3.98</b>               |
| <b>ASN15</b>    |                             | <b>-4.01</b>               |
| <b>VAL17</b>    |                             | <b>-2.18</b>               |
| <b>ASP18</b>    |                             | <b>-4.08</b>               |
| PRO115          |                             | -1.01                      |
| ILE161/25       | -2.99                       | >-0.1                      |
| ASN236          |                             | -3.09                      |
| ASN239          |                             | -1.93                      |
| ARG240          |                             | -6.84                      |
| PRO249          |                             | -2.88                      |
| PRO251          |                             | -3.51                      |
| PHE357/85       | -2.44                       |                            |
| PHE358/86       | -2.19                       |                            |
| PHE361/89       | -2.00                       |                            |
| PHE365/93       | -2.46                       |                            |
| PHE554          |                             | -1.03                      |
| ARG557          |                             | -2.36                      |
