# Supplementary material for: Novel MscL agonists that allow multiple antibiotics cytoplasmic access activate the channel through a common binding site
Source: PubMed Central journal article supplement (PMC6980572; doi:10.1371/journal.pone.0228153), 2020-01-24
Supplement: pone.0228153.s021.pdf [file pone.0228153.s021.pdf]

## Supplemental; Small compounds modulate and bind MscL similarly

**S4 Table. List of radius parameters (in Å) of cycles formed by the same residues in the five chains. Note that the larger the value, the more open it is.**

| Residue      | Scenario 1<br>MscL only <sup>1</sup> | Scenario 2<br>MscL/011 <sup>2</sup> | Scenario 3<br>MscL/K05 <sup>3</sup> | Scenario 4<br>MscL/011 <sup>4</sup> | Scenario 5<br>MscL/K05 <sup>5</sup> | Scenario 6<br>MscL/011 <sup>6</sup> | Scenario 7<br>MscL/K05 <sup>7</sup> |
|--------------|--------------------------------------|-------------------------------------|-------------------------------------|-------------------------------------|-------------------------------------|-------------------------------------|-------------------------------------|
| PHE10        | 16.42 ± 0.18                         | 16.04 ± 0.22                        | 16.56 ± 0.19                        | 18.11 ± 0.16                        | 17.33 ± 0.46                        | 17.56 ± 0.26                        | 16.50 ± 0.25                        |
| ALA11        | 16.89 ± 0.24                         | 16.36 ± 0.20                        | 17.14 ± 0.30                        | 18.37 ± 0.22                        | 17.84 ± 0.57                        | 17.87 ± 0.29                        | 17.24 ± 0.31                        |
| MET12        | 16.55 ± 0.22                         | 16.02 ± 0.19                        | 16.83 ± 0.40                        | 17.70 ± 0.40                        | 17.86 ± 0.74                        | 16.91 ± 0.31                        | 16.82 ± 0.38                        |
| ARG13        | 13.69 ± 0.20                         | 13.13 ± 0.20                        | 13.89 ± 0.36                        | 14.97 ± 0.43                        | 14.95 ± 0.72                        | 14.15 ± 0.33                        | 13.82 ± 0.39                        |
| GLY14        | 11.96 ± 0.22                         | 11.18 ± 0.23                        | 11.79 ± 0.34                        | 13.05 ± 0.67                        | 12.92 ± 0.74                        | 12.75 ± 0.35                        | 11.63 ± 0.41                        |
| <b>ASN15</b> | <b>8.96 ± 0.20</b>                   | <b>8.25 ± 0.20</b>                  | <b>8.69 ± 0.28</b>                  | <b>10.24 ± 0.55</b>                 | <b>10.50 ± 0.81</b>                 | <b>10.15 ± 0.33</b>                 | <b>8.90 ± 0.45</b>                  |
| <b>VAL16</b> | <b>8.57 ± 0.15</b>                   | <b>7.74 ± 0.23</b>                  | <b>8.21 ± 0.18</b>                  | <b>10.51 ± 0.48</b>                 | <b>11.06 ± 0.61</b>                 | <b>10.24 ± 0.26</b>                 | <b>9.85 ± 0.33</b>                  |
| <b>VAL17</b> | <b>10.14 ± 0.12</b>                  | <b>9.64 ± 0.20</b>                  | <b>9.74 ± 0.21</b>                  | <b>12.15 ± 0.36</b>                 | <b>12.15 ± 0.45</b>                 | <b>11.69 ± 0.27</b>                 | <b>11.29 ± 0.33</b>                 |
| <b>ASP18</b> | <b>9.38 ± 0.13</b>                   | <b>9.00 ± 0.17</b>                  | <b>8.96 ± 0.23</b>                  | <b>10.88 ± 0.25</b>                 | <b>11.13 ± 0.66</b>                 | <b>10.34 ± 0.27</b>                 | <b>10.30 ± 0.30</b>                 |
| <b>LEU19</b> | <b>6.84 ± 0.13</b>                   | <b>6.39 ± 0.21</b>                  | <b>6.57 ± 0.20</b>                  | <b>8.36 ± 0.28</b>                  | <b>8.73 ± 0.64</b>                  | <b>7.89 ± 0.26</b>                  | <b>8.02 ± 0.21</b>                  |
| <b>ALA20</b> | <b>7.47 ± 0.12</b>                   | <b>7.24 ± 0.20</b>                  | <b>7.37 ± 0.18</b>                  | <b>9.70 ± 0.22</b>                  | <b>9.50 ± 0.54</b>                  | <b>9.18 ± 0.31</b>                  | <b>9.17 ± 0.21</b>                  |
| <b>VAL21</b> | <b>9.31 ± 0.13</b>                   | <b>9.37 ± 0.13</b>                  | <b>9.12 ± 0.14</b>                  | <b>11.07 ± 0.25</b>                 | <b>11.36 ± 0.56</b>                 | <b>10.54 ± 0.22</b>                 | <b>10.99 ± 0.20</b>                 |
| <b>GLY22</b> | <b>8.19 ± 0.14</b>                   | <b>8.31 ± 0.15</b>                  | <b>8.09 ± 0.14</b>                  | <b>8.94 ± 0.26</b>                  | <b>10.57 ± 0.43</b>                 | <b>8.60 ± 0.19</b>                  | <b>10.35 ± 0.19</b>                 |
| <b>VAL23</b> | <b>6.63 ± 0.13</b>                   | <b>6.56 ± 0.17</b>                  | <b>6.50 ± 0.14</b>                  | <b>7.39 ± 0.13</b>                  | <b>9.10 ± 0.34</b>                  | <b>7.02 ± 0.18</b>                  | <b>9.34 ± 0.17</b>                  |
| <b>ILE24</b> | <b>8.84 ± 0.13</b>                   | <b>8.71 ± 0.15</b>                  | <b>8.63 ± 0.15</b>                  | <b>9.71 ± 0.09</b>                  | <b>10.75 ± 0.32</b>                 | <b>9.38 ± 0.20</b>                  | <b>10.90 ± 0.19</b>                 |
| ILE25        | 10.86 ± 0.12                         | 10.97 ± 0.15                        | 10.73 ± 0.16                        | 11.04 ± 0.13                        | 12.51 ± 0.33                        | 10.86 ± 0.15                        | 12.60 ± 0.21                        |
| GLY26        | 9.62 ± 0.18                          | 9.90 ± 0.22                         | 9.54 ± 0.25                         | 9.07 ± 0.21                         | 11.13 ± 0.35                        | 9.04 ± 0.22                         | 11.49 ± 0.28                        |
| ALA27        | 8.75 ± 0.16                          | 8.91 ± 0.20                         | 8.64 ± 0.22                         | 8.83 ± 0.20                         | 10.09 ± 0.45                        | 8.65 ± 0.16                         | 10.60 ± 0.30                        |
| ALA28        | 11.56 ± 0.16                         | 11.65 ± 0.18                        | 11.42 ± 0.22                        | 11.83 ± 0.17                        | 12.56 ± 0.40                        | 11.63 ± 0.18                        | 12.85 ± 0.28                        |
| PHE29        | 13.23 ± 0.15                         | 13.44 ± 0.20                        | 13.06 ± 0.24                        | 12.94 ± 0.15                        | 13.99 ± 0.49                        | 12.92 ± 0.14                        | 14.25 ± 0.23                        |
| GLY30        | 11.89 ± 0.17                         | 12.17 ± 0.23                        | 11.65 ± 0.26                        | 11.24 ± 0.20                        | 12.22 ± 0.56                        | 11.33 ± 0.16                        | 12.58 ± 0.24                        |
| LYS31        | 12.19 ± 0.19                         | 12.31 ± 0.21                        | 12.01 ± 0.24                        | 11.72 ± 0.23                        | 12.37 ± 0.43                        | 11.75 ± 0.23                        | 12.57 ± 0.22                        |
| ILE32        | 15.29 ± 0.18                         | 15.40 ± 0.21                        | 15.12 ± 0.24                        | 14.84 ± 0.22                        | 15.38 ± 0.41                        | 14.84 ± 0.23                        | 15.58 ± 0.21                        |
| VAL33        | 15.85 ± 0.15                         | 16.16 ± 0.25                        | 15.80 ± 0.31                        | 15.03 ± 0.24                        | 15.63 ± 0.52                        | 15.14 ± 0.18                        | 16.02 ± 0.20                        |
| SER34        | 14.18 ± 0.18                         | 14.47 ± 0.29                        | 14.01 ± 0.34                        | 12.98 ± 0.20                        | 13.67 ± 0.52                        | 13.22 ± 0.20                        | 13.99 ± 0.19                        |
| SER35        | 15.59 ± 0.26                         | 15.66 ± 0.24                        | 15.17 ± 0.30                        | 13.90 ± 0.16                        | 14.93 ± 0.48                        | 14.07 ± 0.23                        | 15.00 ± 0.18                        |
| LEU36        | 18.42 ± 0.20                         | 18.59 ± 0.25                        | 18.11 ± 0.30                        | 16.44 ± 0.21                        | 17.71 ± 0.45                        | 16.84 ± 0.22                        | 17.85 ± 0.17                        |
| VAL37        | 17.95 ± 0.19                         | 18.22 ± 0.31                        | 17.70 ± 0.32                        | 15.97 ± 0.16                        | 16.82 ± 0.46                        | 16.47 ± 0.21                        | 17.12 ± 0.18                        |
| ALA38        | 16.05 ± 0.23                         | 16.27 ± 0.32                        | 15.73 ± 0.32                        | 14.34 ± 0.24                        | 14.54 ± 0.51                        | 14.68 ± 0.23                        | 14.80 ± 0.24                        |
| ASP39        | 17.48 ± 0.27                         | 17.52 ± 0.29                        | 17.09 ± 0.31                        | 16.27 ± 0.26                        | 16.32 ± 0.54                        | 16.61 ± 0.23                        | 16.40 ± 0.28                        |
| ILE40        | 20.09 ± 0.25                         | 20.04 ± 0.26                        | 19.69 ± 0.30                        | 19.18 ± 0.22                        | 19.45 ± 0.54                        | 19.56 ± 0.23                        | 19.62 ± 0.27                        |

1. MscL only, 1222 snapshots, conventional MD

2. MscL/011A, 1717 snapshots, conventional MD

3. MscL/K05, 1537 snapshots, conventional MD

4. MscL/011A, 10 channel-open conformations collected from the “passing-through” experiment

5. MscL/K05, 23 channel-open conformations collected from the “passing-through” experiment

6. MscL/011A, 204 snapshots, conventional MD from a representative active conformation

7. MscL/K05, 604 snapshots, conventional MD from a representative active conformation
