# Supplementary material for: Novel MscL agonists that allow multiple antibiotics cytoplasmic access activate the channel through a common binding site
Source: PLOS journal article supplement (doi:10.1371/journal.pone.0228153), 2020-01-24
Supplement: S1 (10.1371/journal.pone.0228153.s001) [file journal.pone.0228153.s001]

## Supplemental; Small compounds modulate and bind MscL similarly

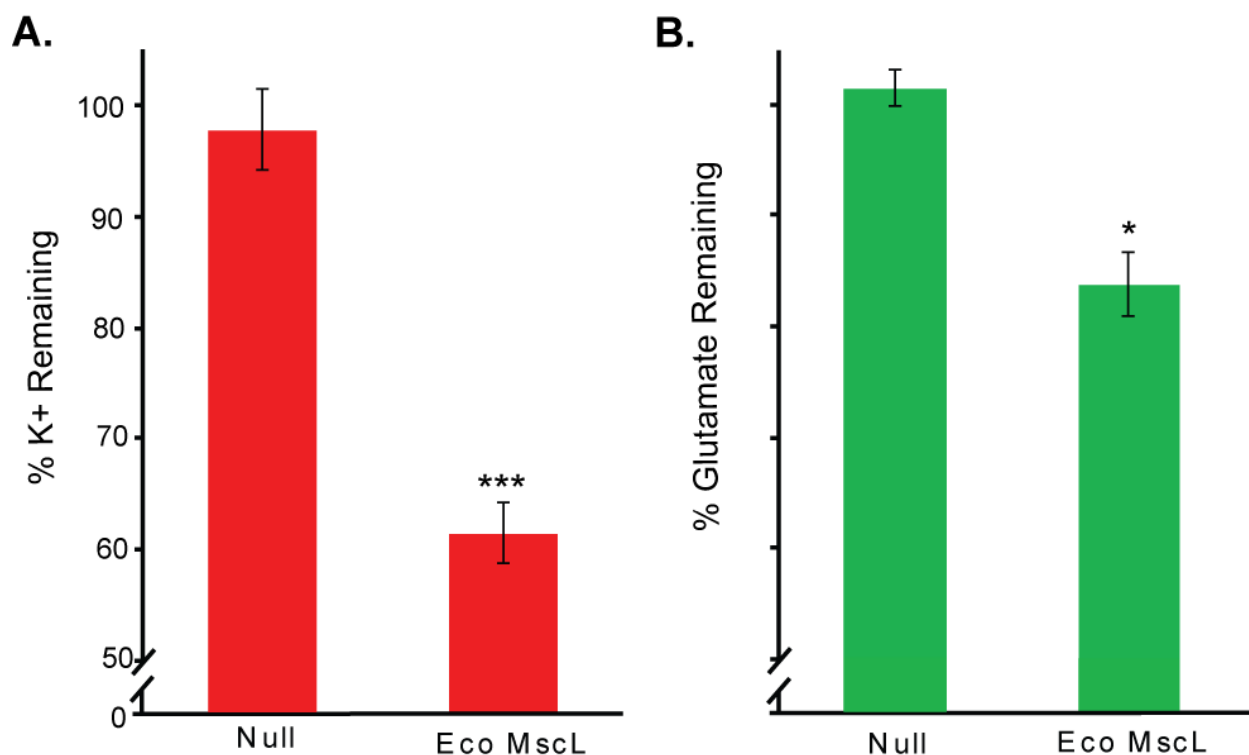**S1 Fig. K05 induces a MscL-dependent reduction in K<sup>+</sup> and glutamate steady state.**

Shown are results from MJF455 cells expressing an empty vector (Null) or *E. coli* MscL (Eco MscL). A) The reduction of potassium was measured as the percentage of K<sup>+</sup> remaining after overnight incubation of 70  $\mu$ M K05 compared to control (non-treated with K05). Error bars reflect s.e.m.  $n=9$ ,  $p<.00005$ , unpaired TTEST. B) The reduction of glutamate was similarly measured as the percentage remaining after overnight incubation of 70  $\mu$ M K05 compared to control. Error bars reflect s.e.m.  $n=3$ ,  $p<.01$ , unpaired TTEST.
